# Supplementary material for: Metabolic Monitoring for Youths Initiating Use of Second-Generation Antipsychotics, 2003–2011
Source: Atypon-hosted journal article supplement (doi:10.1176/appi.ps.201400222), 2015-03-02

## Appendix

### CPT-4 Codes

#### HbA1c testing:

83036 01 HEMOGLOBIN; GLYCOSYLATED (A1C)  
 83037 01 HEMOGLOBIN; GLYCOSYLATED (A1C) BY DEVICE CLEARED BY FDA FOR HOME USE

#### Blood glucose testing:

82947 GLUCOSE; QUANTITATIVE, BLOOD (EXCEPT REAGENT STRIP)  
 82948 GLUCOSE; BLOOD, REAGENT STRIP  
 82950 GLUCOSE; POST GLUCOSE DOSE (INCLUDES GLUCOSE)  
 82951 GLUCOSE; TOLERANCE TEST (GTT), 3 SPECIMENS (INCLUDES GLUCOSE)  
 82952 GLUCOSE; TOLERANCE TEST, EACH ADD'L BEYOND 3 SPECIMENS  
 82962 GLUCOSE; BLOOD, BY GLUCOSE MONITORING DEVICE(S) CLEARED BY THE FDA SPECIFICALLY FOR HOME USE

80048 01 BASIC METABOLIC PANEL (CALCIUM, TOTAL) THIS PANEL MUST INCLUDE THE  
 80048 02 FOLLOWING: CALCIUM, TOTAL (82310), CARBON DIOXIDE (82374), CHLORIDE  
 80048 03 (82435), CREATININE (82565), GLUCOSE (82947), POTASSIUM (84132), SODIUM  
 80048 04 (84295), UREA NITROGEN (BUN) (84520)

80050 01 GENERAL HEALTH PANEL THIS PANEL MUST INCLUDE THE FOLLOWING:  
 80050 02 COMPREHENSIVE METABOLIC PANEL (80053), BLOOD COUNT, COMPLETE (CBC),  
 80050 03 AUTOMATED AND AUTOMATED DIFFERENTIAL WBC COUNT (85025 OR 85027 AND  
 80050 04 85004), OR, BLOOD COUNT, COMPLETE (CBC), AUTOMATED (85027) AND  
 80050 05 APPROPRIATE MANUAL DIFFERENTIAL WBC COUNT (85007 OR 85009), THYROID  
 80050 06 STIMULATING HORMONE (TSH) (84443)  
 80053 01 COMPREHENSIVE METABOLIC PANEL THIS PANEL MUST INCLUDE THE FOLLOWING:  
 80053 02 ALBUMIN (82040), BILIRUBIN, TOTAL (82247), CALCIUM, TOTAL (82310),  
 80053 03 CARBON DIOXIDE (BICARBONATE) (82374), CHLORIDE (82435), CREATININE  
 80053 04 (82565), GLUCOSE (82947), PHOSPHATASE, ALKALINE (84075), POTASSIUM  
 80053 05 (84132), PROTEIN, TOTAL (84155), SODIUM (84295), TRANSFERASE, ALANINE  
 80053 06 AMINO (ALT) (SGPT) (84460), TRANSFERASE, ASPARTATE AMINO (AST) (SGOT)  
 80053 07 (84450), UREA NITROGEN (BUN) (84520)

#### Atypical APMs (Exclude injectable forms):

Risperidone  
 Aripiprazole  
 Olanzapine  
 Quetiapine  
 Ziprasidone

**Oral Antidiabetics:**

Carbutamide  
Acetohexamide  
Chlorpropamide  
Tolbutamide  
Tolazamide  
Glipizide  
Gliclazide  
Glibenclamide  
Glibornuride  
Gliquidone  
Glisoxepide  
Glycopyramide  
Glimepiride  
Metformin  
Rosiglitazone  
Pioglitazone  
Acarbose  
Miglitol  
Repaglinide  
Nateglinide  
Sitagliptin  
Saxagliptin  
Linagliptin

Figure 1. Population Selection Flow Chart

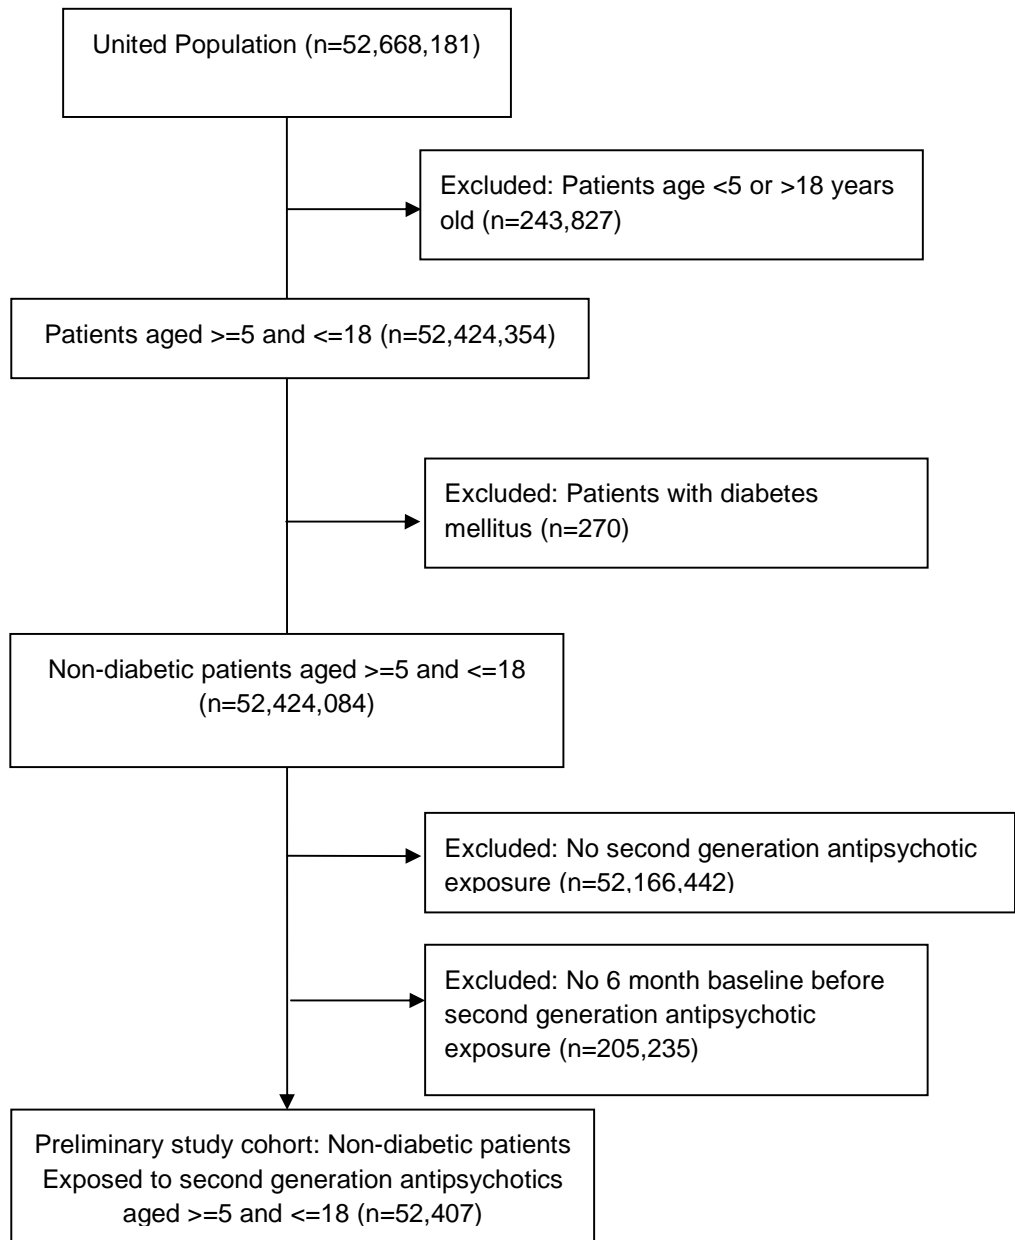

Supplement: appi.ps.201400222.ds001.pdf [file appi.ps.201400222.ds001.pdf]
